# Supplementary material for: Trajectories of plant nitrogen availability globally during 1984-2022 uncovered by satellite-derived nitrogen stable isotope ratio
Source: Research Square preprint supplement (doi:10.21203/rs.3.rs-2843834/v1), 2023-04-25
Supplement: Supplementary file 1 [file 0df5f327e7208413bfeaeb5f.docx]

# Supplementary materials

Table S1. Trend of derived δ15N (all values have units of ‰ yr-1) for each land cover type (LCT) ordered by median. Abbreviations of LCTs match Fig 1. Five LCTs were excluded to minimise human impacts and water/snow signal (see methods).

| LCT | Quantile_5% | Median | Quantile_95% |
| --- | --- | --- | --- |
| DBF | -0.04837 | -0.02111 | 0.00712 |
| SAV | -0.06451 | -0.01994 | 0.02197 |
| WSA | -0.05162 | -0.01774 | 0.01532 |
| DNF | -0.05135 | -0.0166 | 0.00978 |
| FOR | -0.04526 | -0.01649 | 0.01152 |
| ENF | -0.04297 | -0.01419 | 0.01736 |
| CSH | -0.08718 | -0.01385 | 0.04351 |
| EBF | -0.04649 | -0.01355 | 0.01978 |
| BAR | -0.06568 | 0.00339 | 0.08857 |
| OSH | -0.0433 | 0.004044 | 0.04454 |
| GRA | -0.04396 | 0.004329 | 0.05822 |

Table S2. List of datasets used herein. The numbers of observations and sites are data used herein post filtering.

| Dataset | Observations | Sites | Coverage | References |
| --- | --- | --- | --- | --- |
| Craine | 39,785 | 5,222 | Global | Craine et al., 2018 |
| Neon | 1,642 | 723 | North America | NEON, 2022 |
| AusTraits | 174 | 1 | Australia | Falster et al., 2021 |
| SC | 371 | 138 | Southeast China | Tang et al., 2022 |
| NC | 851 | 26 | North China | Wang et al., 2014 |
| Total | 42,824 | 6,111 |  |  |

Table S3. Random forest performance with different predictors from the model with lowest root mean square error (RMSE; in unit ‰) of the ten-fold cross validation.

| Predictors | RMSE | R2 |
| --- | --- | --- |
| Reflectance | 1.83 | 0.77 |
| Reflectance + MAP + MAT | 1.92 | 0.74 |
| Reflectance + MAP + MAT + Mycorrhizae | 1.79 | 0.78 |


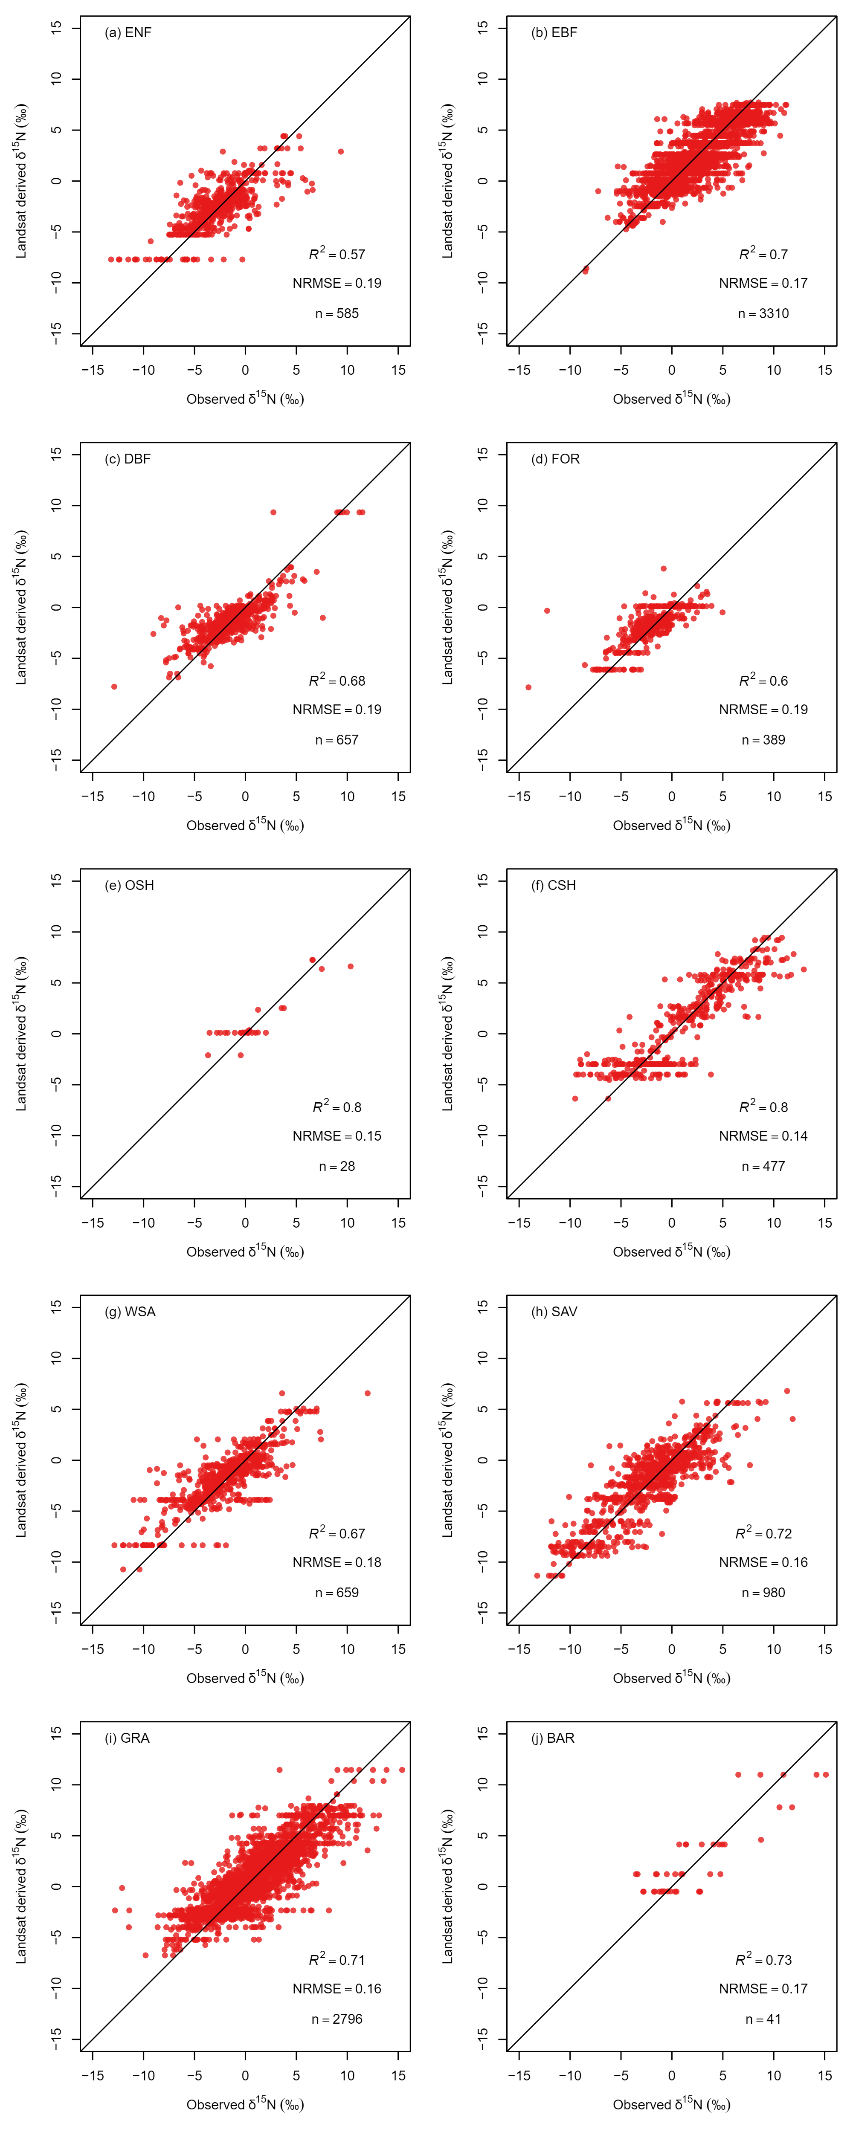


Fig S1. The Landsat-derived δ15N evaluated against independent ground-based observations by land cover types (LCTs). Abbreviations of LCTs match Fig 1. R2 is from linear regression between Landsat-derived and observed δ15N. The black lines show the 1:1 ratio. n is the number of individual observations. Normalised root mean square error (NRMSE) is calculated by 5% and 95% of the observations. The order of LCTs follows descending tree cover.


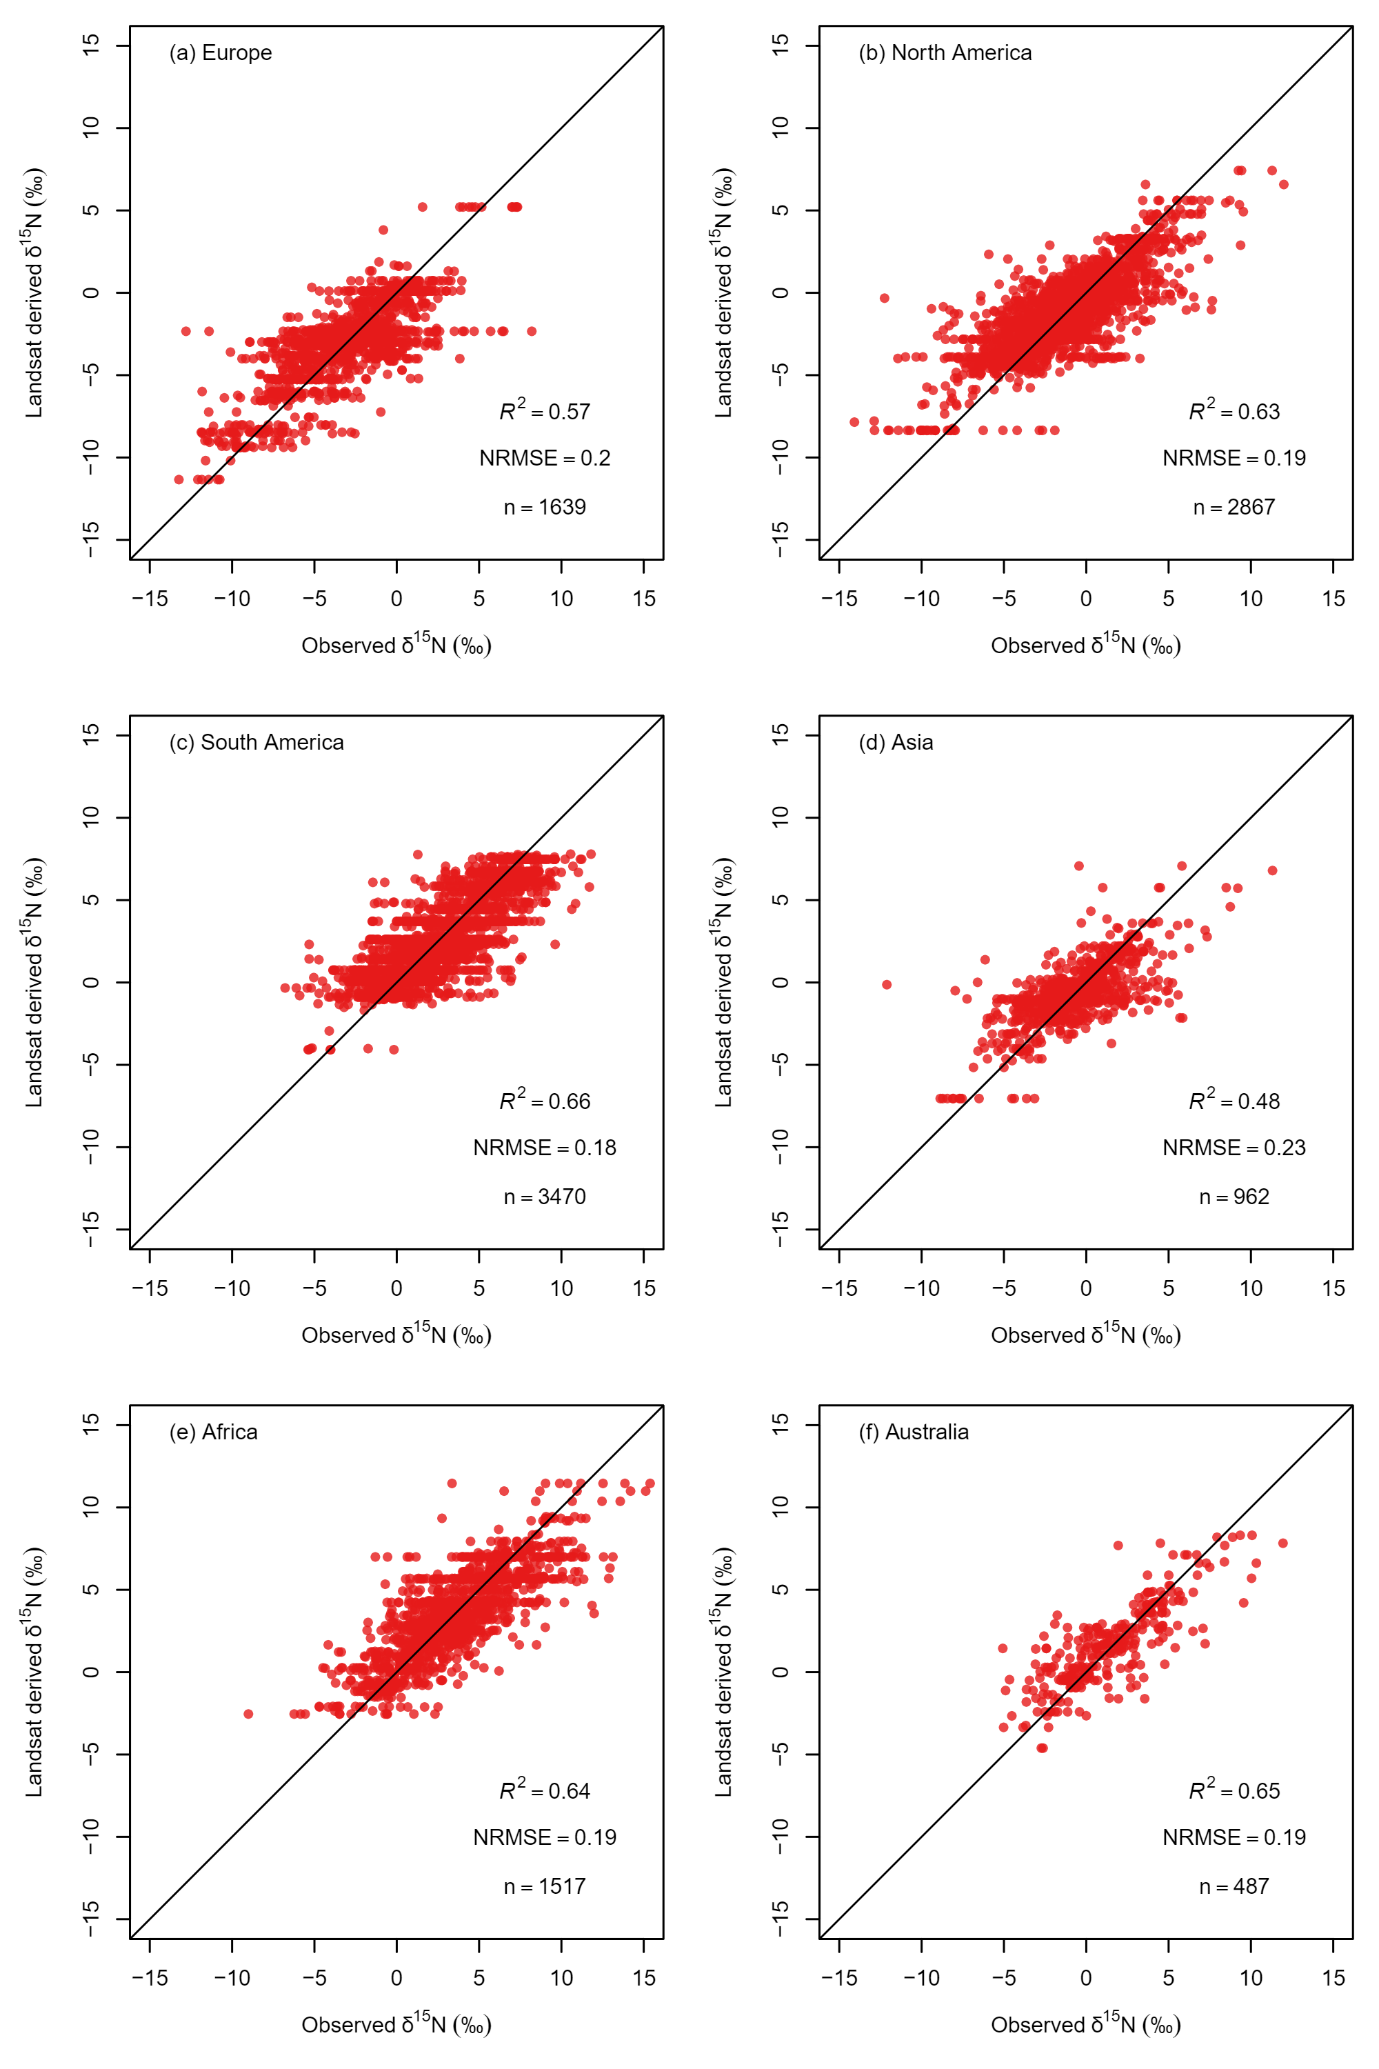


Fig S2. The Landsat-derived δ15N evaluated against independent ground-based observations by each continent. R2 is from linear regression between Landsat-derived and observed δ15N. The black lines show the 1:1 ratio. n is the number of individual observations. Normalised root mean square error (NRMSE) is calculated by 5% and 95% of the observations. The order of LCTs follows descending tree cover.


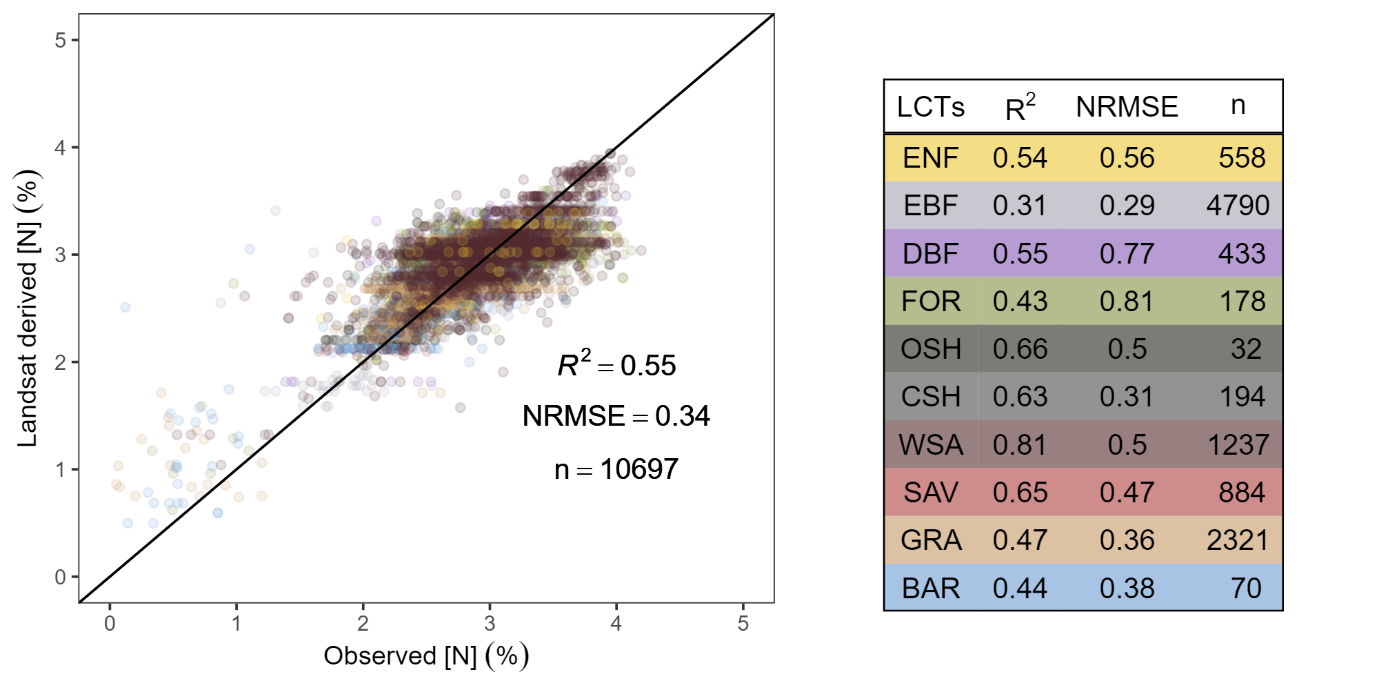


Fig S3. Landsat-derived N concentration ([N]) evaluated against independent [N] observations in log scale. Model prediction and observations of plant [N] were log-transformed. Abbreviations of land cover types (LCTs) match Fig 1. R2 is from linear regression between derived and observed δ15N. Normalised root mean square error (NRMSE) is calculated by 5% and 95% of the observations. n is the number of individual observations. The black lines show the 1:1 ratio.


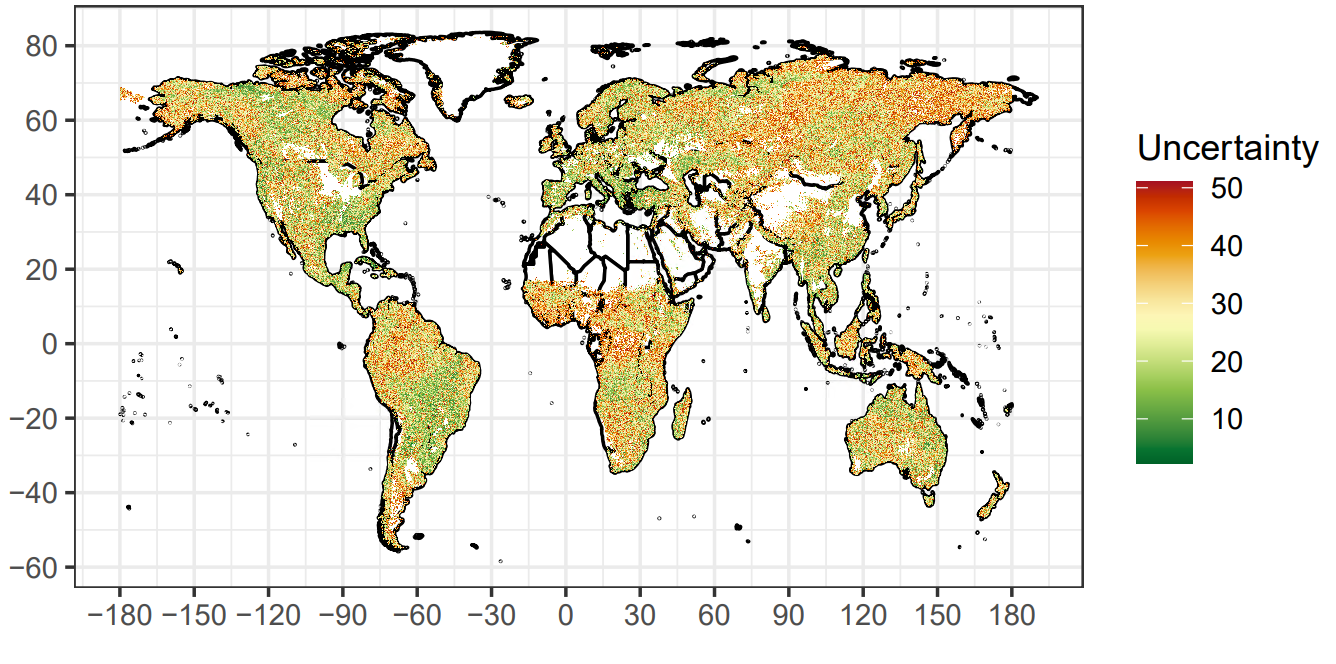


Fig S4. The relative prediction uncertainty (%) of the global trend of derived δ15N for pixels with significant trends (585,564 pixels). The uncertainty is calculated as the standard error of the trends divided by the trend times 100.


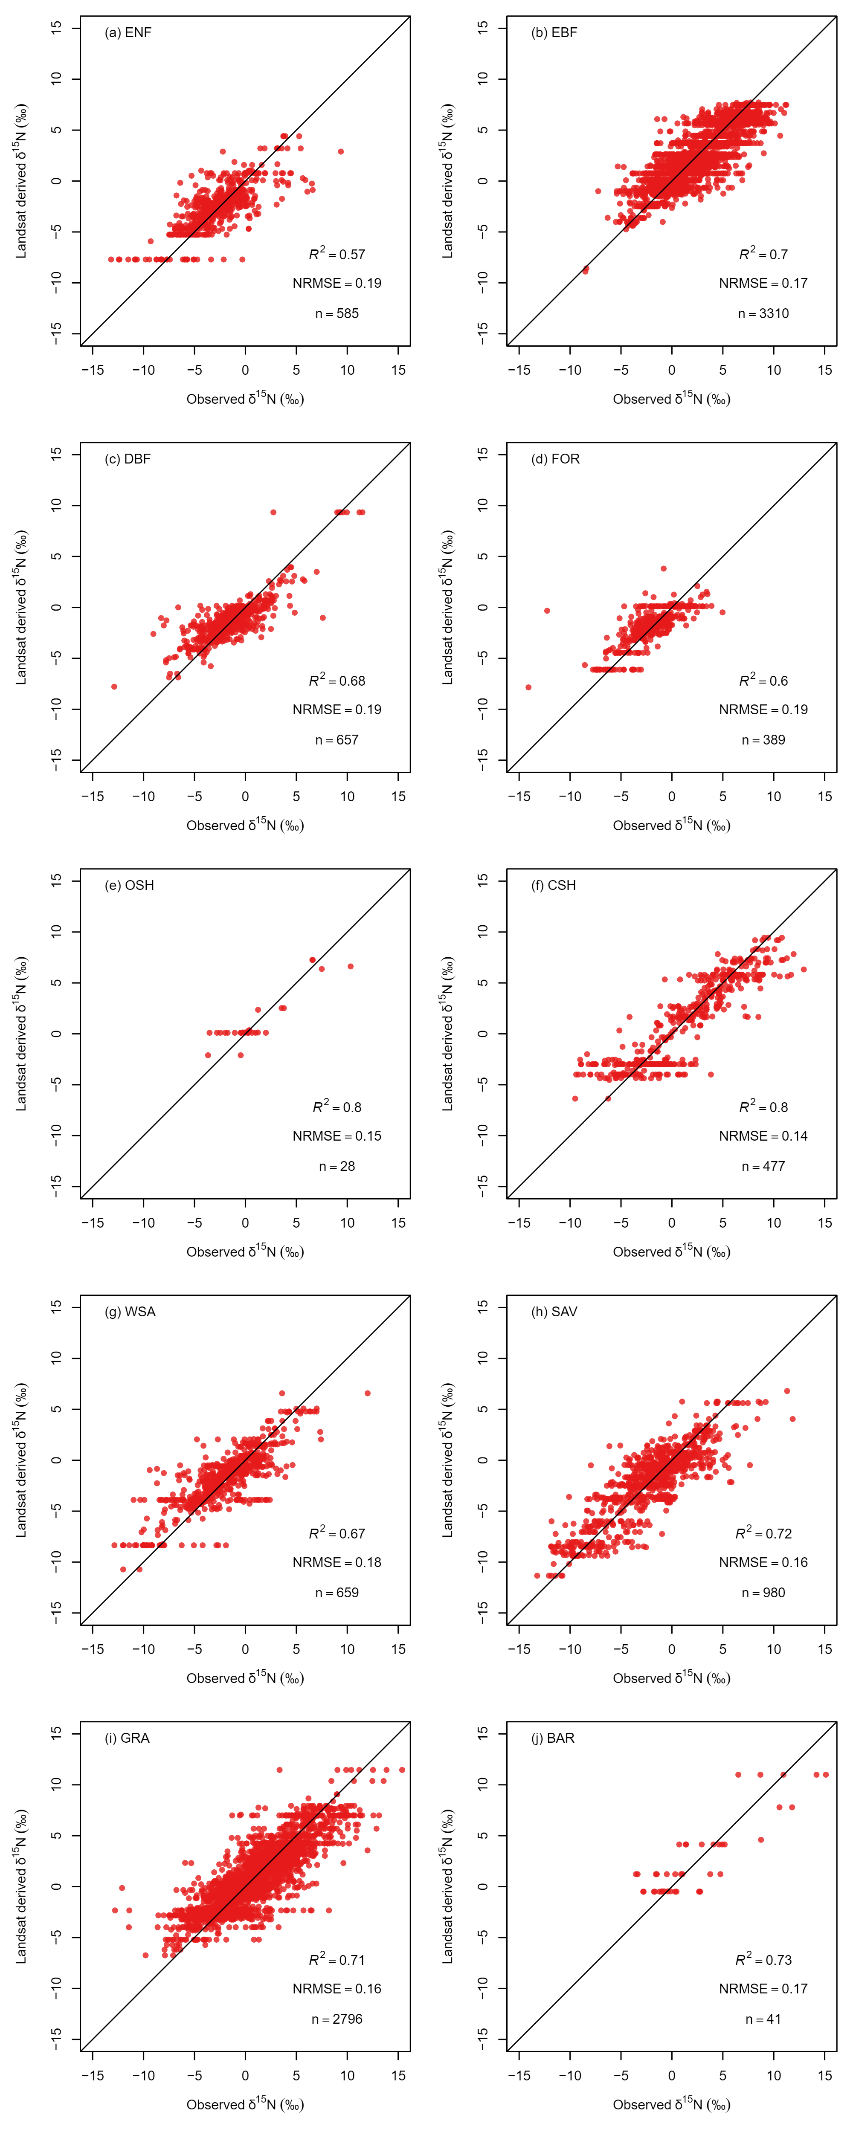


Fig S5. The Landsat-derived δ15N evaluated against independent ground-based observations by each land cover type (LCT). Abbreviations of LCTs match Fig 1. This training and evaluation used independent random sites. Slopes and R2 are from linear regression between derived and observed δ15N. The black lines show the 1:1 ratio. n is the number of individual observations. The order of LCTs follows descending tree cover.


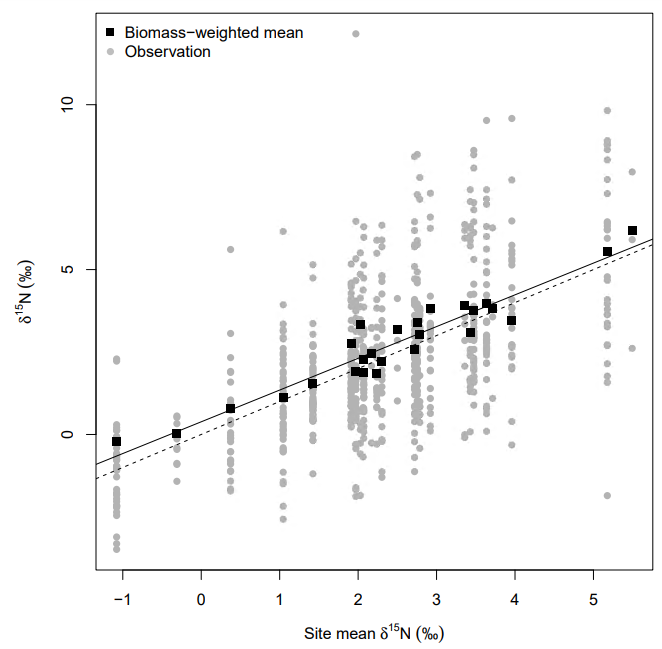


Fig S6. The mean δ15N of each site compared almost 1:1 to the biomass-weighted mean. The dashed line is 1:1. The black line if the linear regression between mean and biomass-weighted mean. The grey dots are the individual observations.
